# Supplementary material for: Marker-Assisted Pyramiding of CRa and CRd Genes to Improve the Clubroot Resistance of Brassica rapa
Source: MDPI journal article supplement (doi:10.3390/genes13122414), 2022-12-19
Supplement: s1 [file s1]

**Table S1.** Molecular markers linked with *CRd* and *CRA* loci used for polymorphism screening

| Marker                 | Primer-F                | Primer-R                 |
|------------------------|-------------------------|--------------------------|
| Yau96                  | ACGGCTAAACTATCAGCTGAGT  | AGATCAAGAATTGGCCAGACA    |
| Yau106                 | GGTCACCAATCGAAGCCTTT    | GCATGCGGGTATACACATCT     |
| Yau377                 | TTCACCGTTGTATTGGCGTG    | GCTCTCCTCTAACCTGTTCCA    |
| Yau389                 | TCAAGTGGAGAGGGTCAGTC    | CAGTCACGAGGTCCCTAACA     |
| Yau115                 | CCGTTTGGTTTCCCTTGCAA    | GTTTAACACAGCAACAACAATGG  |
| Yau135                 | GGACTTTAAATCGGCTGGACC   | GAGGTCGACACAGAGAGATCA    |
| Yau118                 | GAAGCTTCTGGATCACTGCG    | ACAATAGCGAAATGGGCCAG     |
| HC352b                 | CTTTATAATGGCTACTATTTA   | TGCTCATGAGTGTATAACTA     |
| <i>CRA</i> full length | ATGGATTTCTCTCTTTTCC     | TTAACATGAGGGAGTTTCCAG    |
| <i>CRam</i>            | GCGTTTGAATCTTAGTCATTGCT | TCAAAGACTAACTCGGGAGCACTC |

**Table S2.** The distribution of background markers on 10 linkage groups to CR5274

| Linkage group | Number of markers | Linkage group length (Mb) | Physical distance (Mb) | Average interval (Mb) |
|---------------|-------------------|---------------------------|------------------------|-----------------------|
| A01           | 13                | 26.8                      | 26.0                   | 2.0                   |
| A02           | 9                 | 26.9                      | 25.9                   | 2.9                   |
| A03           | 11                | 31.8                      | 30.0                   | 2.7                   |
| A04           | 7                 | 19.3                      | 18.9                   | 2.7                   |
| A05           | 9                 | 25.3                      | 25.3                   | 2.8                   |
| A06           | 10                | 25.2                      | 25.2                   | 2.5                   |
| A07           | 10                | 25.9                      | 25.8                   | 2.6                   |
| A08           | 9                 | 20.8                      | 20.8                   | 2.3                   |
| A09           | 9                 | 38.9                      | 38.5                   | 4.3                   |
| A10           | 8                 | 16.4                      | 14.3                   | 1.8                   |
| Total         | 95                | 257.3                     | 250.7                  | 2.6                   |
